# Supplementary material for: Detection of Alpha-Fetoprotein in Hepatocellular Carcinoma Patient Plasma with Graphene Field-Effect Transistor
Source: MDPI journal article supplement (doi:10.3390/s18114032), 2018-11-19
Supplement: s1 [file s1]

## Supporting information

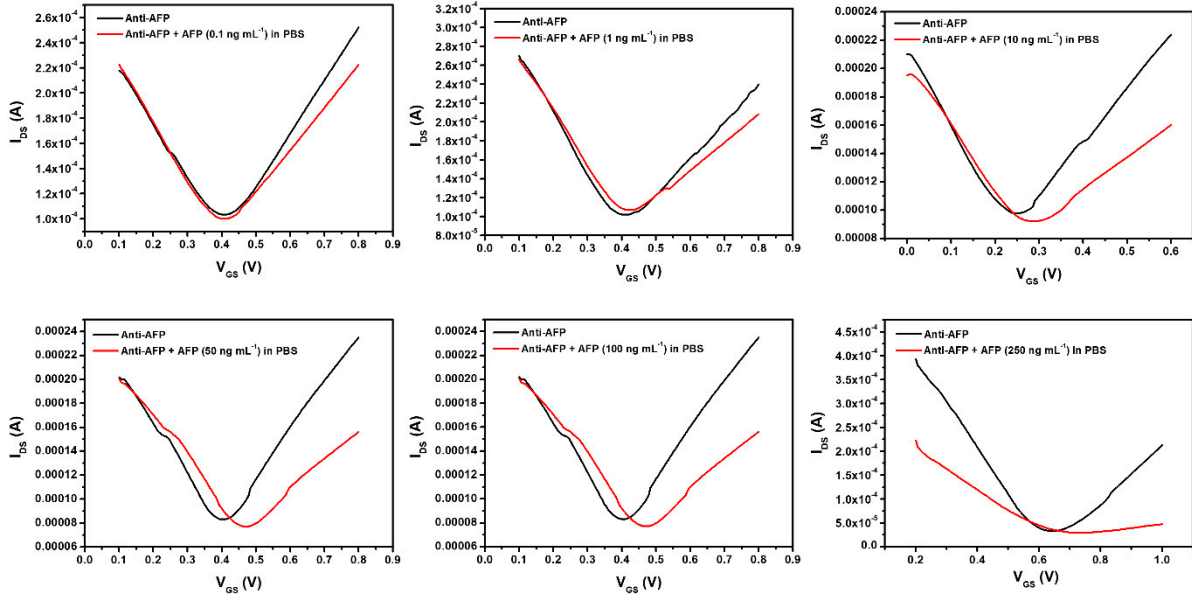

**Figure S1.** The  $I_{DS}$ - $V_{GS}$  characteristics of G-FET before and after binding to each concentration of AFP (0.1, 1, 10, 50, 100 and 250 ng mL<sup>-1</sup>) in PBS on the anti-AFP-immobilized channel surface.

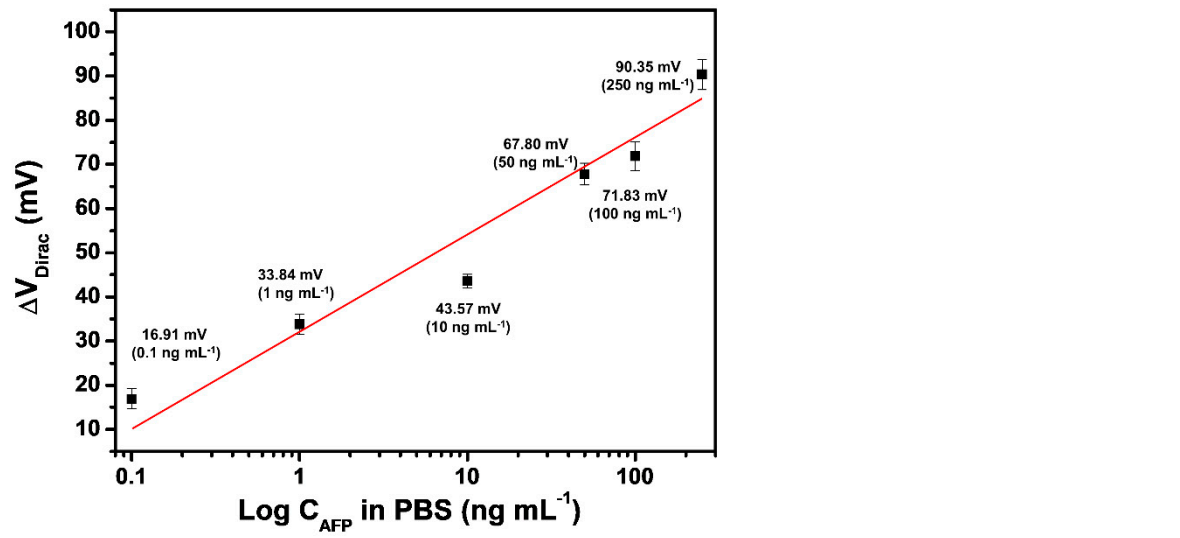

**Figure S2.** The sensitivity of the anti-AFP-immobilized G-FET for AFP detection in PBS into semi-log scale

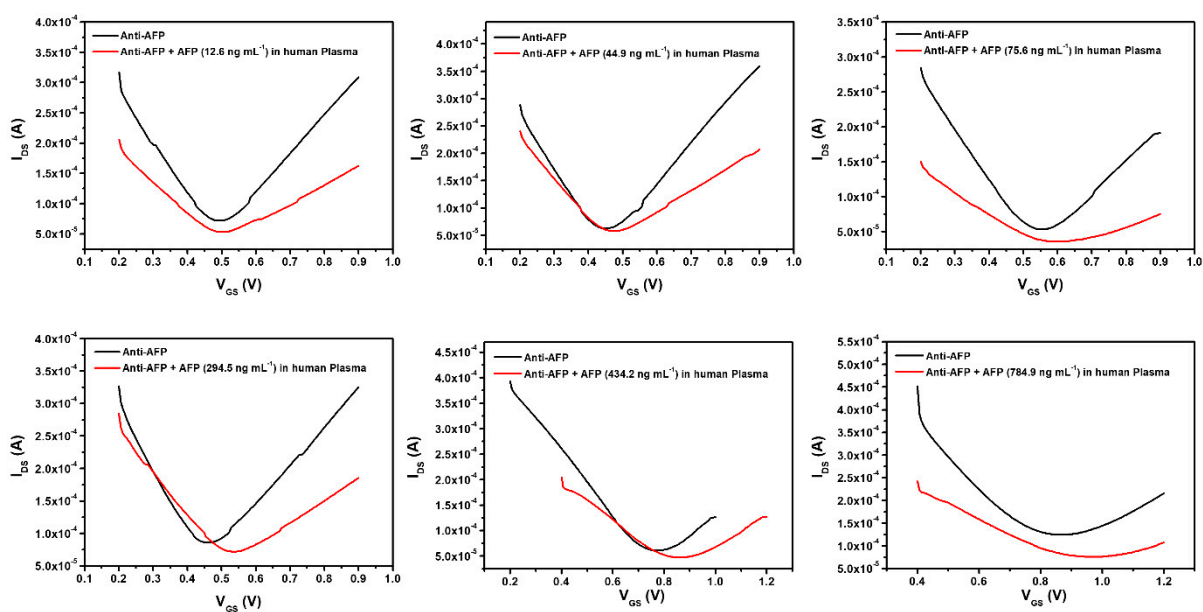

**Figure S3.** The  $I_{DS}$ - $V_{GS}$  characteristics of G-FET before and after binding to each concentration of AFP (12.6, 44.9, 75.6, 294.5, 434.2, and 784.9 ng mL<sup>-1</sup>) in human plasma of HCC patient on the anti-AFP-immobilized channel surface.

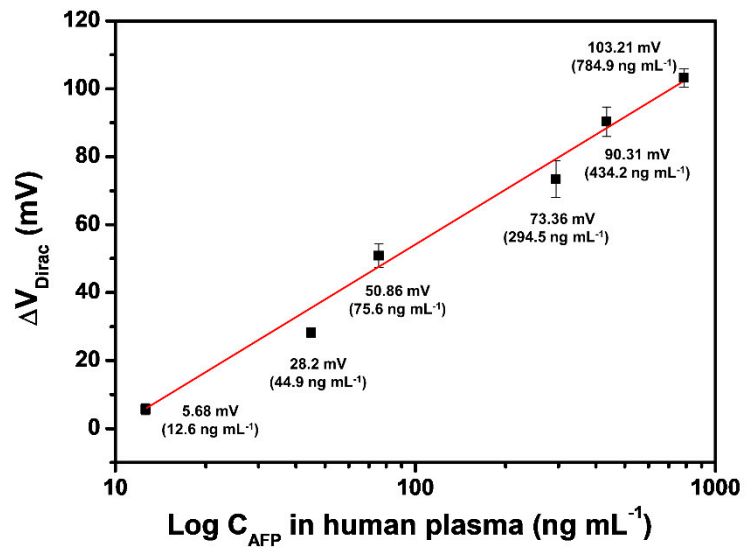

**Figure S4.** The sensitivity of the anti-AFP-immobilized G-FET for AFP detection in human plasma from HCC patients into semi-log scale.
